# Supplementary material for: Alleviating Heavy Metal Toxicity in Milk and Water through a Synergistic Approach of Absorption Technique and High Voltage Atmospheric Cold Plasma and Probable Rheological Changes
Source: MDPI journal article supplement (doi:10.3390/biom12070913), 2022-06-29
Supplement: s1 [file s1]

## Supplemental material

The LVR determination provides a dynamic mechanical report of the change in the microstructure under a critical strain.

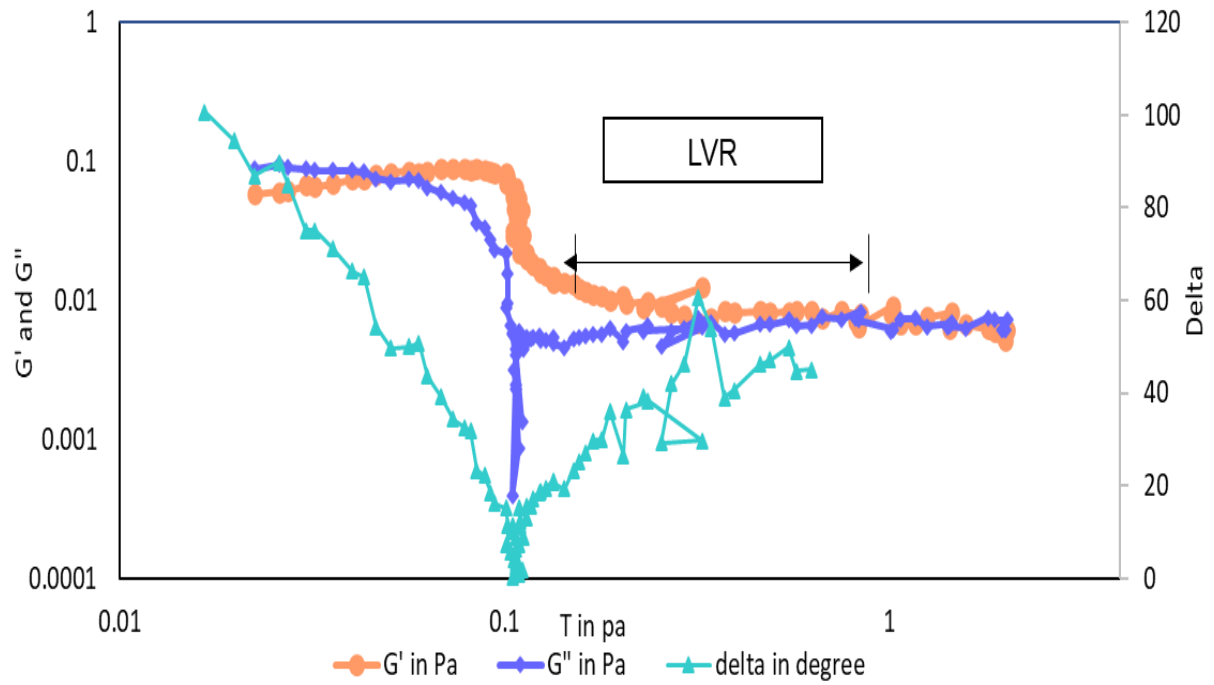

**Figure S1.** Linear Viscoelastic Region of the milk samples.

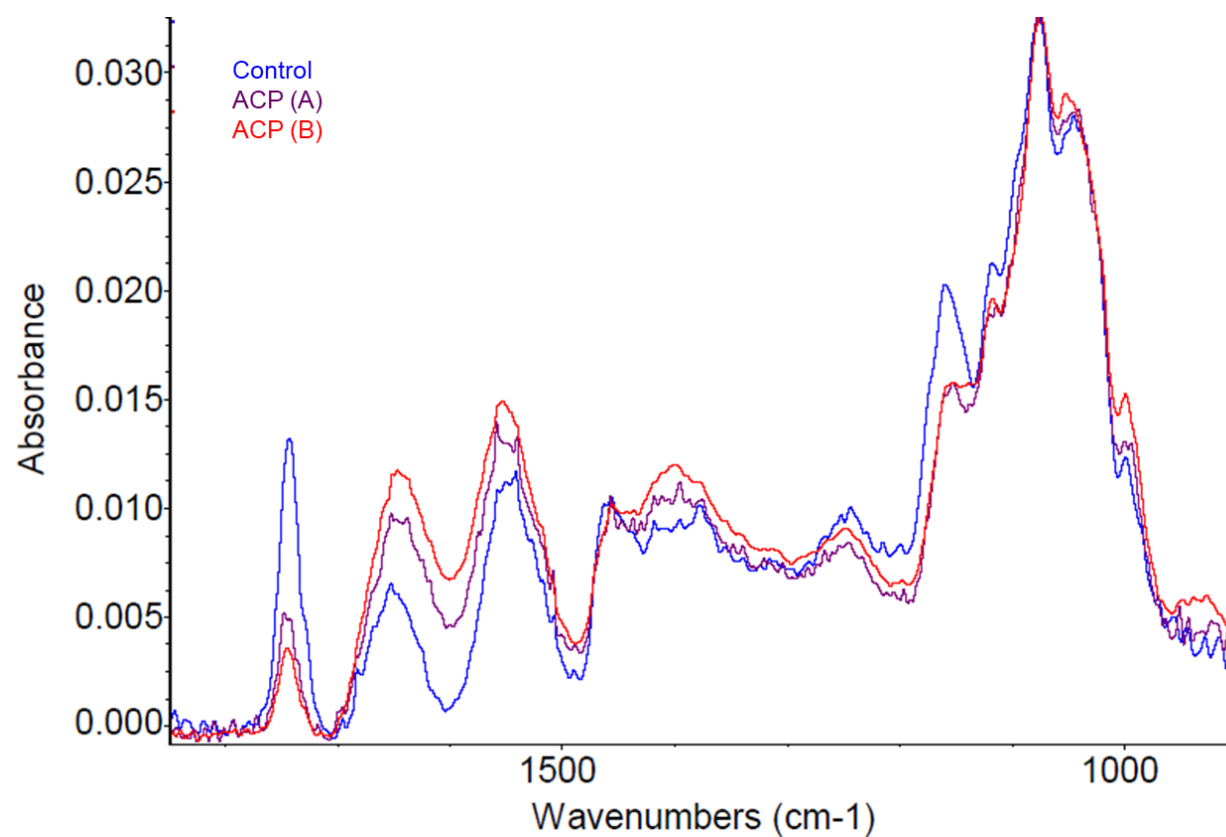

**Figure S2:** Expanded fingerprint region from FTIR spectrum of the milk samples. ACP (A) and ACP (B) denotes the sample treated with 50 kV for 2 minutes with 0- and 24-hours storage time respectively

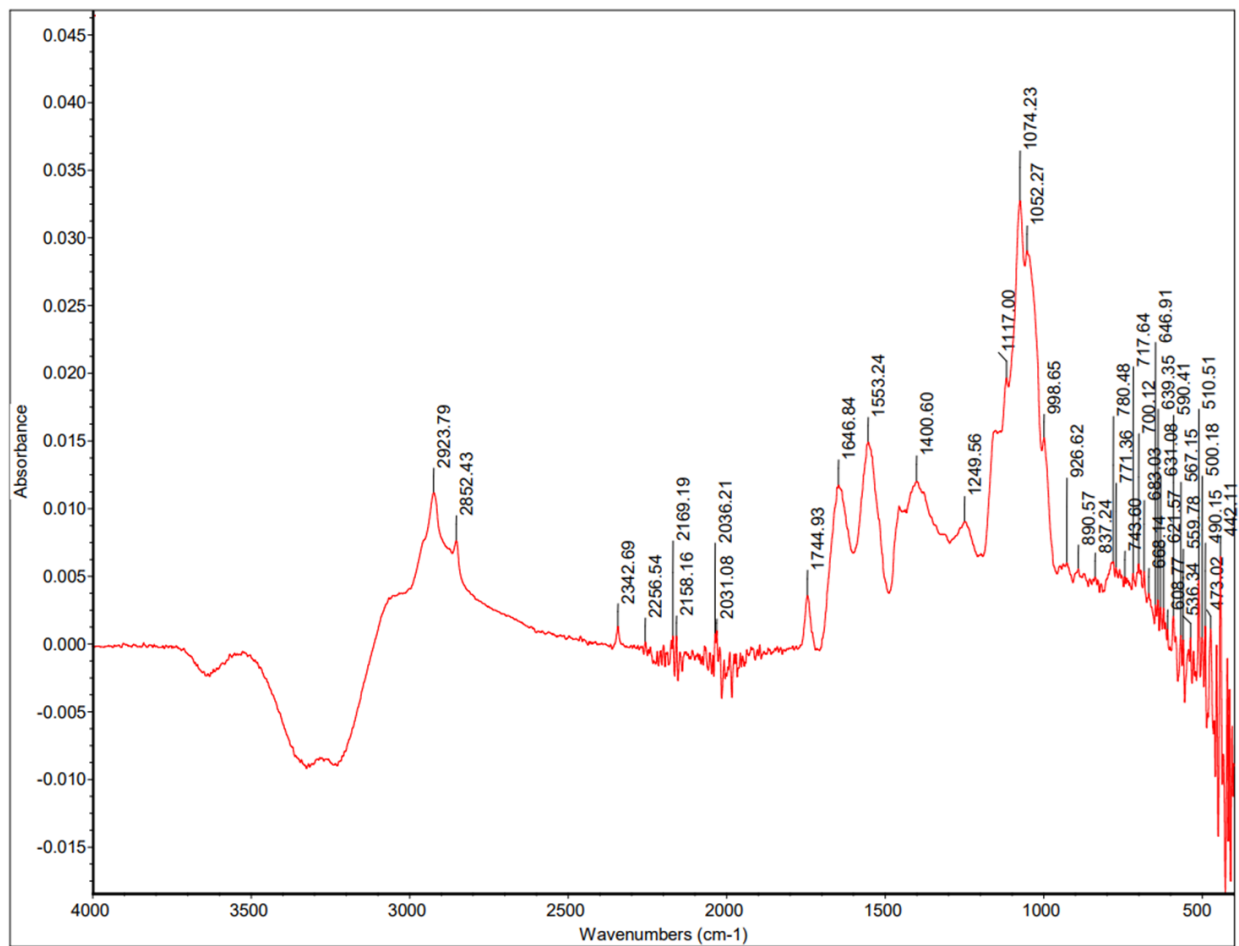

**Figure S3:** Peaks from the FTIR spectrum of the milk samples when the sample was plasma treated with 50 kV for 2 minutes with 24-hours storage time.
